# Supplementary material for: Polyphenolic extract from Punica granatum peel causes cytoskeleton-related damage on Giardia lamblia trophozoites in vitro
Source: PeerJ journal article supplement (doi:10.7717/peerj.13350), 2022-04-27
Supplement: PeerJ_Raw_Data.7z [file Raw Data.xlsx]

## Sheet: Adherence Inhibition
	DMSO				125 g/ml				150 g/ml				175 µg/ml				200 µg/mL				MTZ (1.5 µg/mL)
24 h	2.34473	4.76286	4.28024	4.28024	5.30398	0	6.61013	5.30398	6.61013	8.85508	10.7152	5.91492	11.8598	16.6675	13.1953	11.8598	24.2432	25.0008	23.2464	24.2432	13.1953	16.6675	13.1953	16.6675
48 h	1.22865	1.08232	1.38668	4.88685	1.94699	7.06086	2.41391	2.16933	9.36276	9.36276	9.36276	8.69137	22.9583	25.2929	25.2929	22.9583	48.6389	48.6389	48.6389	41.3016	22.9583	22.9583	20.1049	20.1049
72 h	3.35452	2.78602	2.78602	2.78602	3.68893	3.05531	3.05531	3.05531	5.54107	11.3136	10.4608	5.54107	20.4096	23.2521	25.5778	25.5778	36.0434	36.0434	36.0434	41.5254	12.2881	12.2881	23.2521	14.7246

## Sheet: Growth Inhibition
	DMSO				125 g/ml				150 g/ml				175 µg/ml				200 µg/mL				MTZ (1.5 µg/mL)
24 h	100	100	100	100	100.915	103.007	92.0262	104.052	93.0719	86.7974	76.3399	77.3856	78.9543	79.4771	79.4771	74.7712	65.3595	64.8366	62.7451	63.7908	54.3791	55.4248	54.902	54.3791	29.8039	45.4902	44.9673	53.8562	33.4641	32.9412	31.8954	31.8954
48 h	100	100	100	100	92.9712	96.8051	92.9712	120.767	80.5112	72.8435	89.1374	81.4697	56.5495	60.3834	64.2173	57.508	46.9649	42.1725	45.0479	42.1725	29.7125	24.9201	24.9201	23.0032	46.9649	52.7157	48.8818	44.0895	28.754	30.6709	37.3802	26.8371
72 h	100	100	100	100	97.1279	102.35	96.0836	100.261	73.1071	71.0183	54.3081	60.5744	68.9295	61.6188	54.3081	62.6632	49.0862	48.0418	50.1305	54.3081	32.376	35.5091	36.5535	30.2872	57.4412	55.3525	55.3525	60.5744	30.2872	34.4648	28.1984	34.4648

## Sheet: Densitometric analysis 
	GAPDH					A-TUBULIN
DMSO	0.20407	0.20288	0.19671	0.20021	0.19983	0.24846	0.24401	0.23792	0.24147	0.24716
150	0.26186	0.26529	0.26495	0.26295	0.27175	0.20853	0.20752	0.21346	0.20879	0.20498
175	0.25189	0.25024	0.24457	0.24746	0.24985	0.24819	0.25293	0.24974	0.24981	0.24787
200	0.28217	0.28159	0.29376	0.28938	0.27856	0.29483	0.29554	0.29889	0.29993	0.29998

## Sheet: Rebuttal letter
		ALPHA TUBULIN WESTERN BLOT
	DMSO	3124668	3073712	3151968	3201323	3055259
	125	3047585	3171472	3255074	3044494	3271178
		TRYPAN BLUE EXCLUSION ASSAY
		0				DMSO				125 g/mL				150 g/mL				175 g/mL				200 g/mL
	24 h	96	95	97	98	98	96	95	96	95	96	93	95	97	94	96	95	95	95	94	90	92	92	89	90
	48 h	97	96	99	96	98	97	97	97	95	93	95	91	95	91	94	94	90	93	92	92	88	90	87	83
	72 h	98	96	97	95	96	95	97	97	94	96	93	93	92	93	92	91	92	91	94	91	92	89	85	88
